# Supplementary material for: Evaluation of anthropogenic emissions of black carbon from East Asia in six inventories: constraints from model simulations and surface observations on Fukue Island, Japan
Source: Royal Society of Chemistry journal article supplement (doi:10.1039/d1ea00051a), 2022-01-01
Supplement: d1ea00051a1.pdf [file d1ea00051a1.pdf]

## Supplementary Information

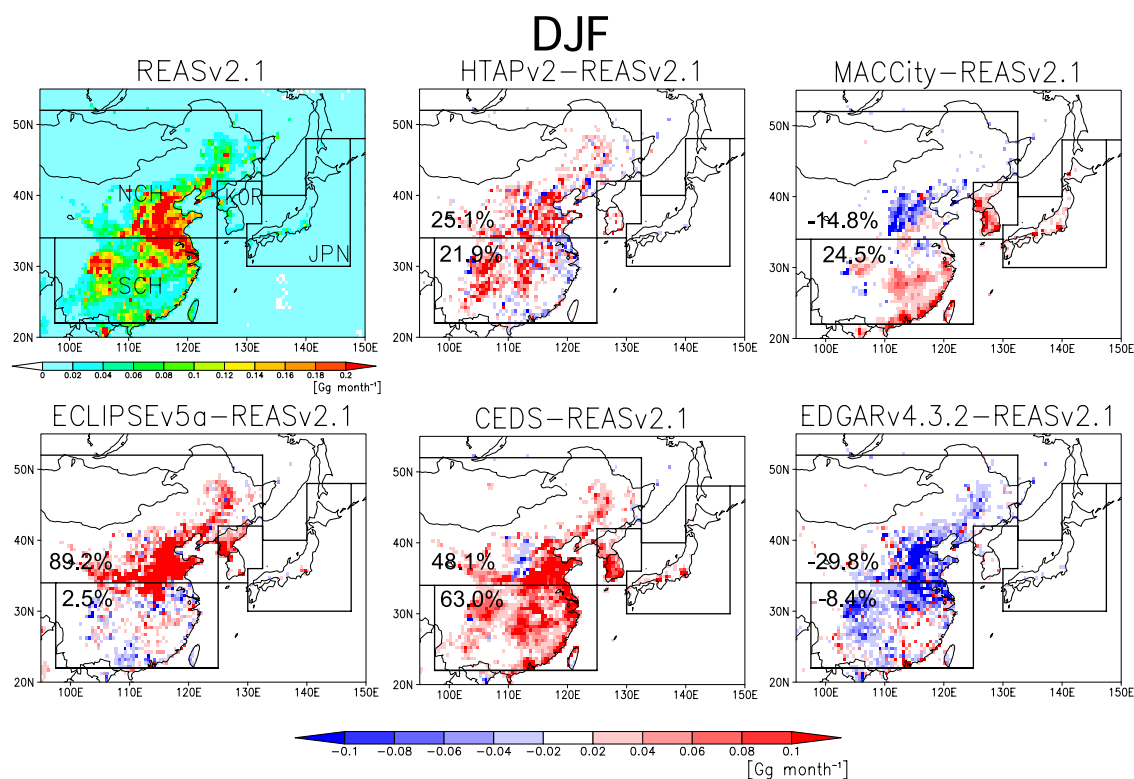

**Fig. S1** Anthropogenic BC emissions in winter (December–February) estimated by REASv2.1 for 2008 and absolute differences with HTAPv2, MACCity, ECLIPSEv5a, CEDS, and EDGARv4.3.2 for 2010. Values shown in NCH and SCH are relative differences between REASv2.1 and the other five inventories.

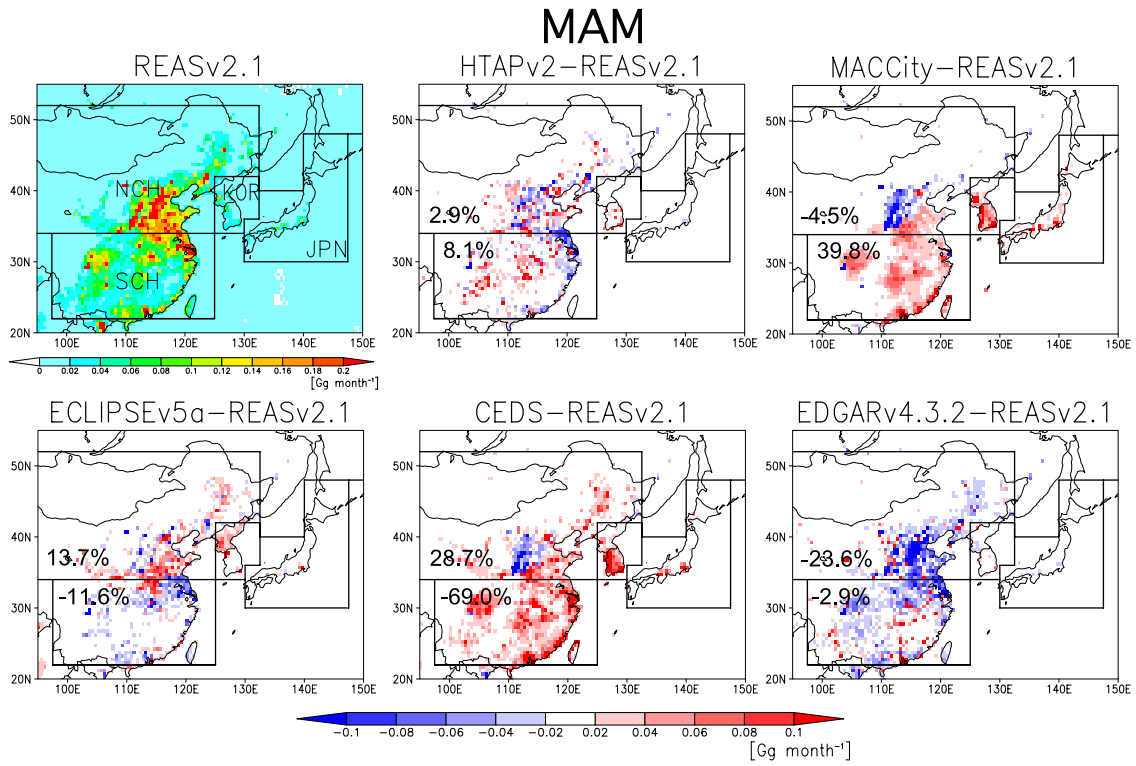

**Fig. S2** Same as Fig. S1 but for spring (March–May).

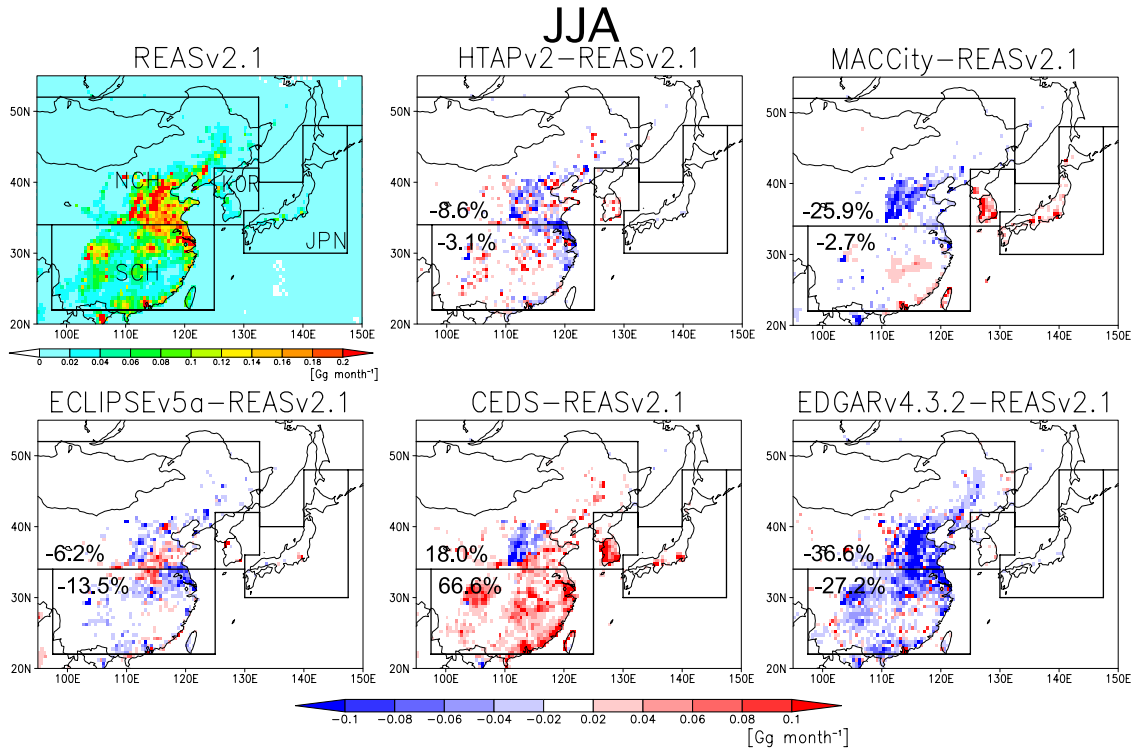

**Fig. S3** Same as Fig. S1 but for summer (June–August).

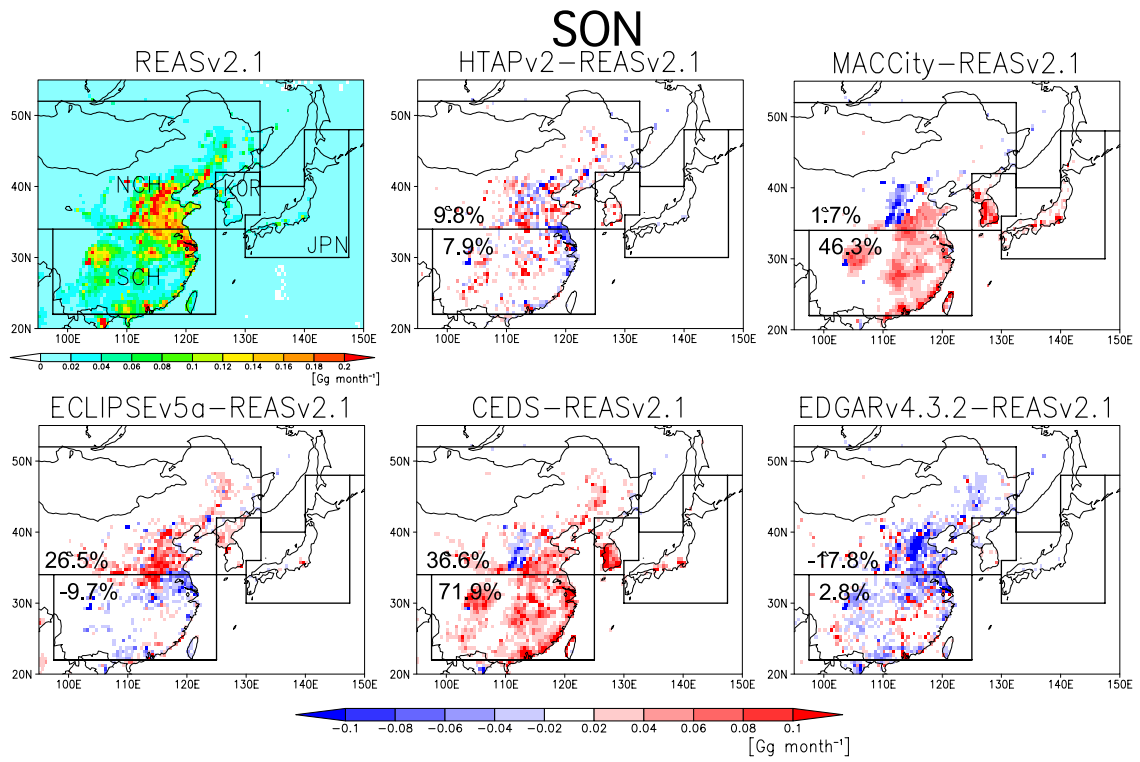

**Fig. S4** Same as Fig. S1 but for autumn (September–November).

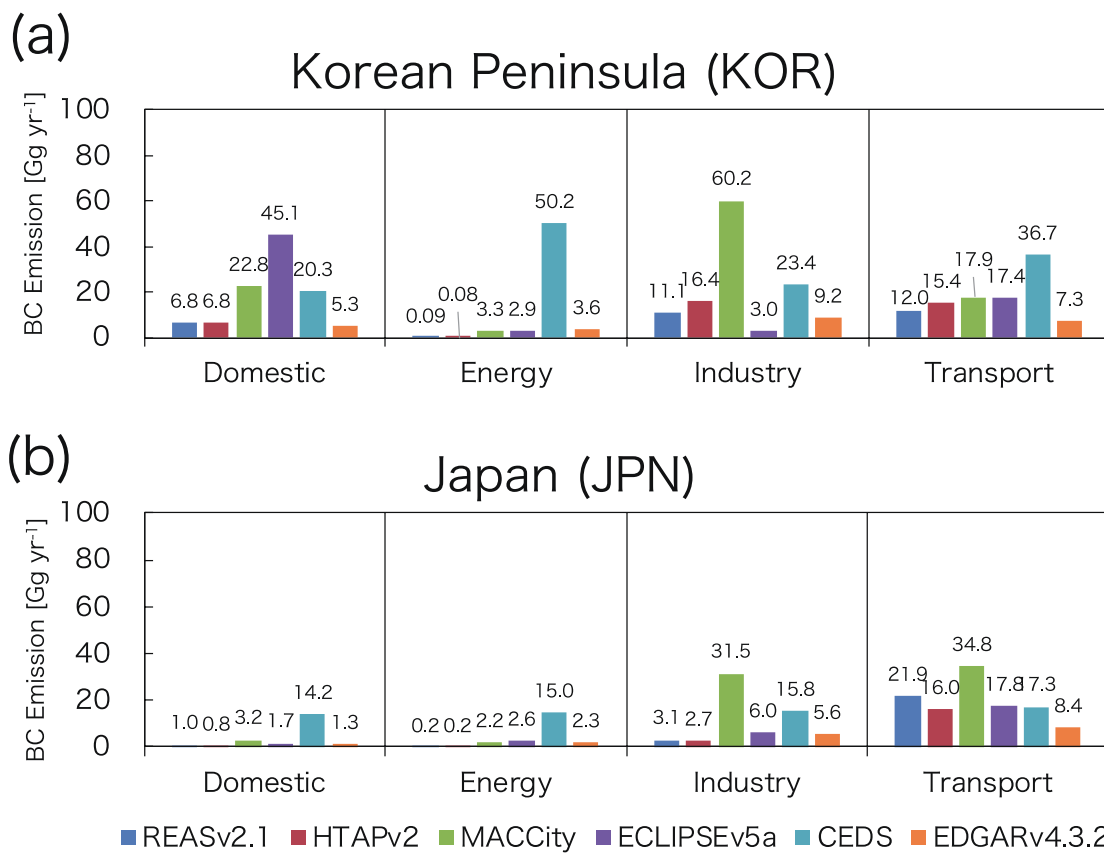

**Fig. S5** BC emissions for four source sectors (domestic, energy, industry, and transport) estimated by six inventories in (a) KOR and (b) JPN.

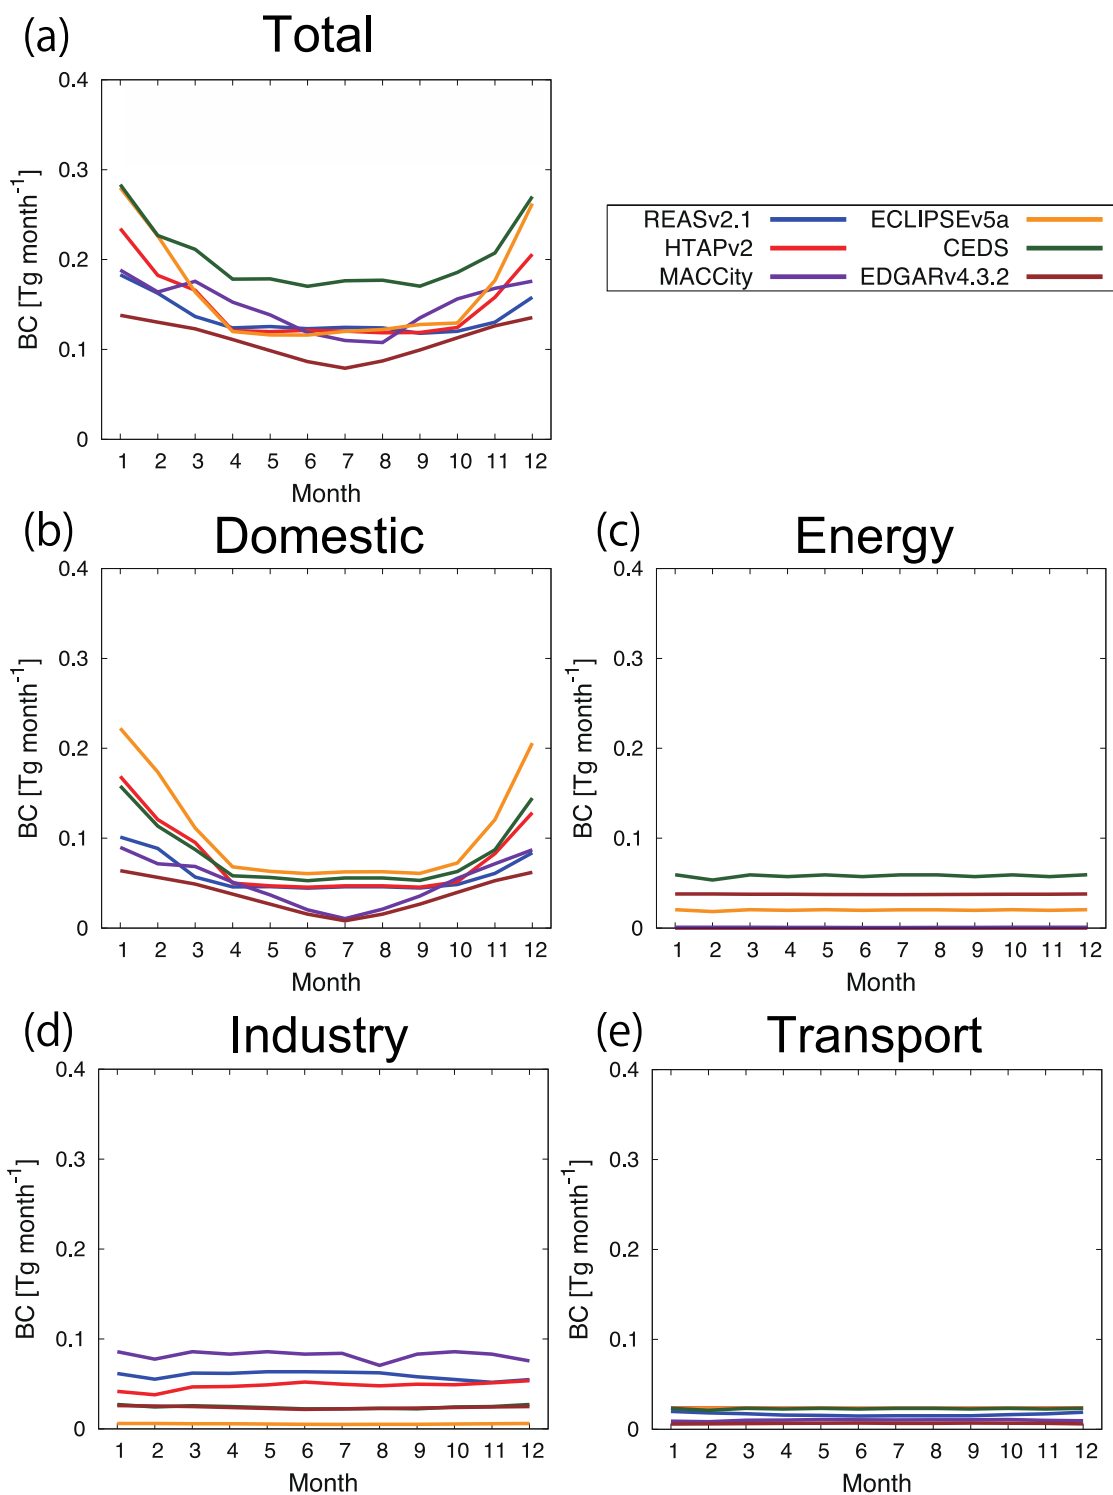

**Fig. S6** (a) Monthly variations of total BC emissions from China. Monthly emissions of (b) domestic, (c) energy, (d) industry, and (e) transport sector from China.

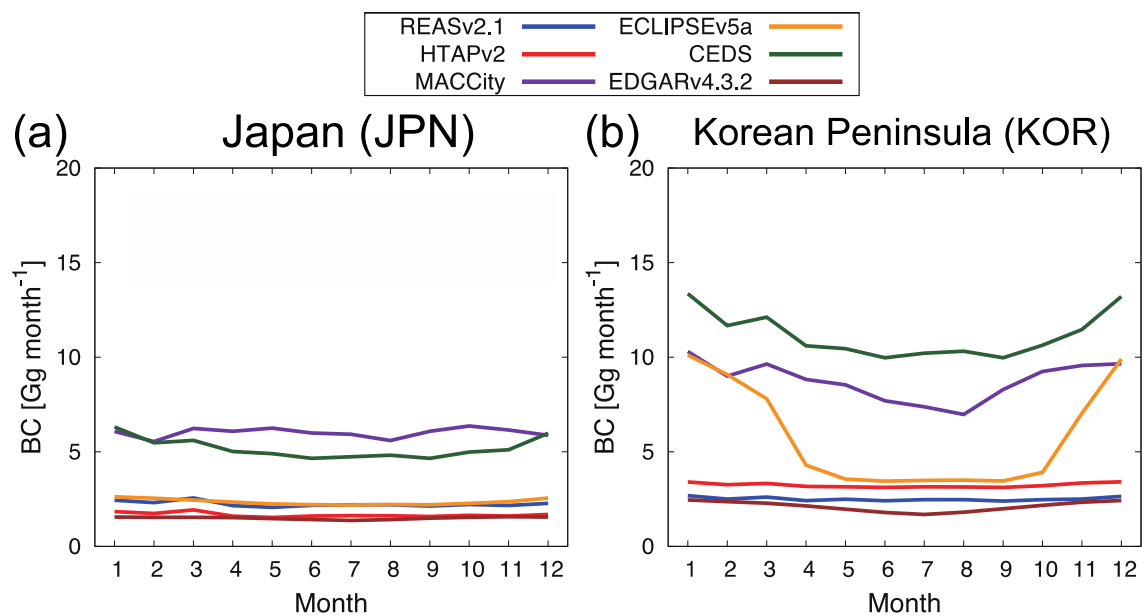

**Fig. S7** Monthly variations of total BC emissions from (a) Japan and (b) the Korean Peninsula.

**Table S1** Seasonal BC emissions from each region in East Asia estimated by REASv2.1 for 2008, HTAPv2, MACCity, ECLIPSEv5a, CEDS, and EDGARv4.3.2 for 2010 (Gg season<sup>-1</sup>).

|     |        | REASv2.1 | HTAPv2 | MACCity | ECLIPSEv5a | CEDS  | EDGARv4.3.2 |
|-----|--------|----------|--------|---------|------------|-------|-------------|
| NCH | Winter | 209.5    | 215.6  | 200.0   | 238.3      | 269.6 | 160.1       |
|     | Spring | 196.1    | 179.3  | 145.2   | 184.0      | 231.3 | 124.3       |
|     | Summer | 198.2    | 217.6  | 201.6   | 250.8      | 270.8 | 162.9       |
|     | Autumn | 273.5    | 342.0  | 233.0   | 517.3      | 404.9 | 192.1       |
| SCH | Winter | 176.6    | 190.9  | 246.9   | 156.0      | 298.5 | 171.5       |
|     | Spring | 175.5    | 180.9  | 180.3   | 151.7      | 292.3 | 127.7       |
|     | Summer | 170.2    | 183.6  | 249.0   | 153.7      | 292.6 | 174.9       |
|     | Autumn | 230.2    | 280.7  | 286.7   | 236.0      | 375.3 | 210.9       |
| KOR | Winter | 7.5      | 9.6    | 27.0    | 15.6       | 33.2  | 6.4         |
|     | Spring | 7.4      | 9.4    | 22.0    | 10.4       | 30.5  | 5.3         |
|     | Summer | 7.3      | 9.7    | 27.1    | 14.4       | 32.1  | 6.5         |
|     | Autumn | 7.8      | 10.1   | 29.0    | 29.1       | 38.2  | 7.2         |
| JPN | Winter | 6.8      | 5.0    | 18.6    | 7.0        | 15.5  | 4.5         |
|     | Spring | 6.6      | 4.8    | 17.5    | 6.6        | 14.2  | 4.2         |
|     | Summer | 6.5      | 4.8    | 18.6    | 6.8        | 14.7  | 4.6         |
|     | Autumn | 7.0      | 5.3    | 17.5    | 7.7        | 17.8  | 4.6         |

Winter: December to February; spring: March to May; summer: June to August; autumn: September to November, NCH: North China; SCH: South China; KOR: Korean Peninsula; JPN: Japan.

**Table S2** Average BC concentrations at Fukue Island of observations and model simulations for the case of  $R_{\text{NCH}} > R_{\text{SCH}}$  after the data selection ( $R_{\text{CHN}} > 80\%$  and  $\text{TE}_{\text{CHN}} > 80\%$ ) and ratios of the average values of model to observation.

|                 |                          | REASv2.<br>1 | HTAPv2 | MACCity | ECLIPSE<br>v5a | CEDS  | EDGARv<br>4.3.2 |
|-----------------|--------------------------|--------------|--------|---------|----------------|-------|-----------------|
| Hourly          | data                     | 1873         | 1838   | 1264    | 2214           | 1173  | 1209            |
| numbers         |                          |              |        |         |                |       |                 |
| Observation     | ( $\mu\text{g m}^{-3}$ ) | 1.073        | 1.097  | 1.069   | 1.047          | 1.101 | 1.060           |
| Model           | ( $\mu\text{g m}^{-3}$ ) | 1.407        | 1.594  | 1.479   | 1.895          | 2.195 | 1.108           |
| Model/Obs ratio |                          | 1.31         | 1.45   | 1.38    | 1.81           | 1.99  | 1.04            |

**Table S3** Average BC concentrations at Fukue Island of observations and model simulations for the case of  $R_{\text{SCH}} > R_{\text{NCH}}$  after the data selection ( $R_{\text{CHN}} > 80\%$  and  $\text{TE}_{\text{CHN}} > 80\%$ ) and ratios of the average values of model to observation.

|                 |                          | REASv2.<br>1 | HTAPv2 | MACCity | ECLIPSE<br>v5a | CEDS  | EDGARv<br>4.3.2 |
|-----------------|--------------------------|--------------|--------|---------|----------------|-------|-----------------|
| Hourly          | data                     | 574          | 383    | 716     | 362            | 760   | 1169            |
| numbers         |                          |              |        |         |                |       |                 |
| Observation     | ( $\mu\text{g m}^{-3}$ ) | 0.889        | 0.894  | 0.864   | 0.669          | 0.828 | 0.958           |
| Model           | ( $\mu\text{g m}^{-3}$ ) | 1.352        | 1.363  | 1.440   | 1.058          | 2.066 | 1.412           |
| Model/Obs ratio |                          | 1.52         | 1.53   | 1.67    | 1.58           | 2.50  | 1.47            |
